# Supplementary material for: Electrical and chemical properties of vacancy-ordered lead free layered double perovskite nanoparticles
Source: Royal Society of Chemistry journal article supplement (doi:10.1039/d2nr00565d), 2022-01-01
Supplement: d2nr00565d1.pdf [file d2nr00565d1.pdf]

## Supporting information

Electrical and chemical properties of vacancy-ordered lead free layered double perovskite nanoparticles

Amal Sawahreh<sup>1</sup>, Tal Binyamin<sup>1</sup>, Jie Jiang<sup>2</sup>, Oded Millo<sup>3</sup>, Oren Goldberg<sup>3</sup>, Doron Azulay<sup>3</sup>, Ruth Pachter<sup>2</sup>, Lioz Etgar<sup>1,\*</sup>

<sup>1</sup> Institute of Chemistry, Casali Center for Applied Chemistry and the Center for Nanoscience and Nanotechnology, The Hebrew University of Jerusalem, Jerusalem 91904, Israel.

<sup>2</sup> Air Force Research Laboratory, Materials and Manufacturing Directorate, Wright-Patterson Air Force Base, Ohio 45433, U.S.A.

<sup>3</sup> Racah Institute of Physics, The Hebrew University of Jerusalem and the Center for Nanoscience and Nanotechnology, Jerusalem 91904, Israel.

\* Lioz.etgar@mail.huji.ac.il

| x     | Manganese acetate [mmol] | Cadmium acetate [mmol] |
|-------|--------------------------|------------------------|
| x=1   | 0                        | 0.18                   |
| x=0.8 | 0.036                    | 0.144                  |
| x=0.7 | 0.054                    | 0.126                  |
| x=0.5 | 0.09                     | 0.09                   |
| x=0   | 0.18                     | 0                      |

Table S1: moles of materials use to synthesize  $\text{Cs}_4\text{Cd}_x\text{Mn}_{1-x}\text{Bi}_2\text{X}_{12}$

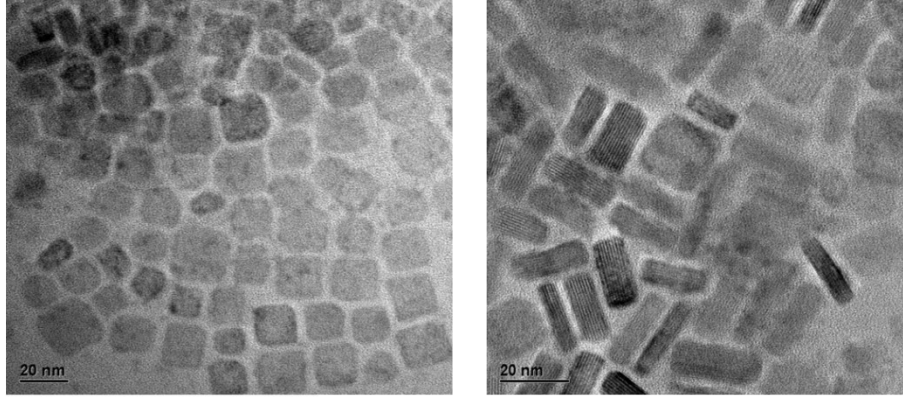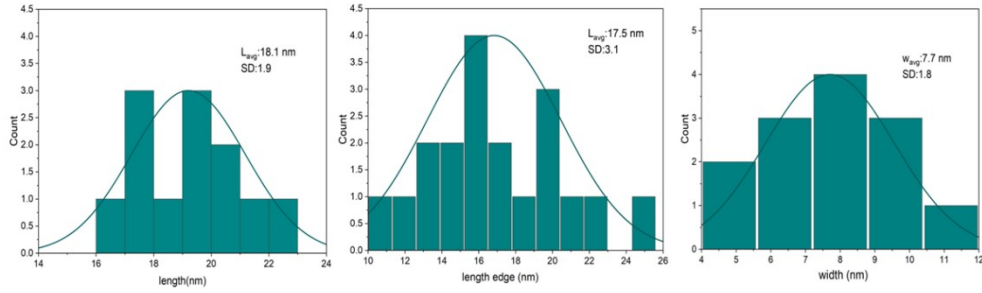

Figure S1: HR-TEM characterization of DLP ( $x=1$ ) nanoparticle in two different orientations; (a)-zone axis:  $(1\ 0\ 1)$ , (b) zone axis:  $(1\ -1\ 0)$ . The size distribution histograms of  $x=1$ , (c) in zone axis  $(101)$  the average length is  $18.1 \pm 1.9\text{nm}$ , (d) in zone axis  $(1\ -1\ 0)$  the average edge length is  $17.5 \pm 3.1\text{nm}$ , (f) the average width is  $7.7 \pm 1.8\text{nm}$ .

Table S2: Miller Indices and d-spacing for the different FFT patterns

| $Cs_3BiCl_6$ –zone axis $[1\ 0\ 1]$<br>(figure 4b) |                |                    | $Cs_4CdBi_2Cl_{12}$ –zone axis $[1\ 0\ 1]$<br>(figure 1c) |                |                    | $Cs_4CdBi_2Cl_{12}$ –zone axis $[1\ -1\ 0]$<br>(figure 1e) |                |                    |
|----------------------------------------------------|----------------|--------------------|-----------------------------------------------------------|----------------|--------------------|------------------------------------------------------------|----------------|--------------------|
| (h k l)                                            | d-spacing [nm] | 1/d-spacing [1/nm] | (h k l)                                                   | d-spacing [nm] | 1/d-spacing [1/nm] | (h k l)                                                    | d-spacing [nm] | 1/d-spacing [1/nm] |
| 1 1 3                                              | 0.362          | 2.762              | 1 1 0                                                     | 0.381          | 2.624              | 1 1 0                                                      | 0.380          | 2.631              |
| -1 3 2                                             | 0.255          | 3.921              | 2 0 8                                                     | 0.267          | 3.733              | 1 0 2                                                      | 0.622          | 1.607              |
|                                                    |                |                    |                                                           |                |                    | 2 2 0                                                      | 0.199          | 5.024              |

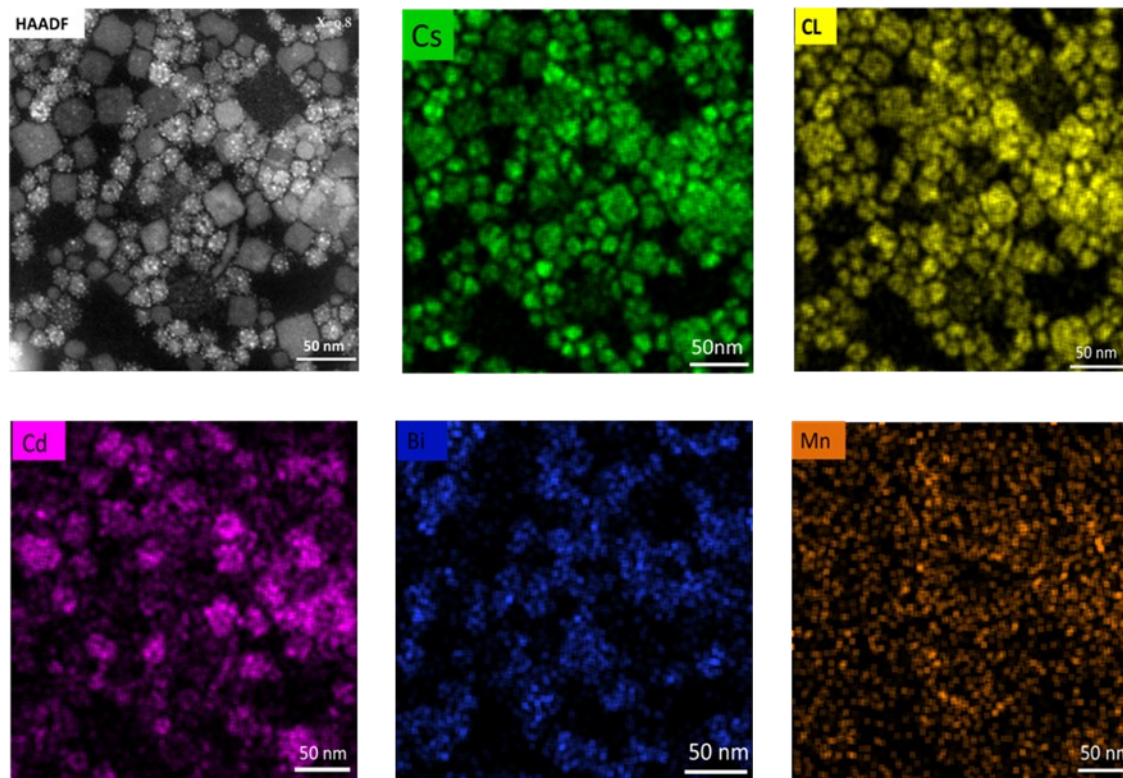

Figure S2: (a) high magnification STEM image  $Cs_4Cd_{0.8}Mn_{0.2}Bi_2Cl_{12}$  ( $x=0.8$ ), (b), (c), (d), (e), (f) STEM-EDS element maps for Cs, Cl, Cd, Bi, Mn; squares show the presence of side product  $Cs_3BiCl_6$

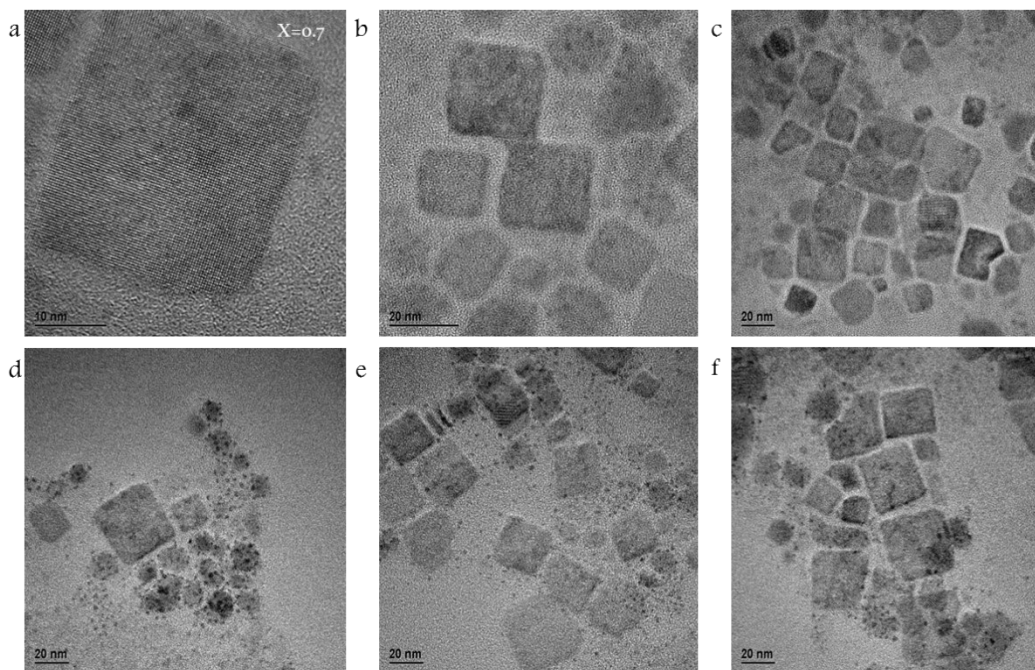

Figure S3: TEM characterization of  $Cs_4Cd_{0.7}Mn_{0.3}Bi_2Cl_{12}$  ( $x=0.7$ ) in different magnifications.

|       | VBM (ev) | E0 (ev) | Work function (ev) |
|-------|----------|---------|--------------------|
| X=0.8 | 3.16     | 14.67   | 6.53               |
| X=0.5 | 1.93     | 14.04   | 7.16               |

Table S3: VBM, E0 and work function measured by UPS analysis

### Density Functional Theory (DFT) Calculations

Computational details. DFT calculations were carried out with the Vienna ab initio simulation package VASP 5.4.<sup>1</sup> The Kohn-Sham equations are solved using a plane wave basis set with an energy cutoff of 350 eV, and the projector augmented-wave (PAW) potential was applied.<sup>2</sup> A  $2 \times 2 \times 2$  k-point sampling was used for the  $2 \times 2 \times 1$   $Cs_4MnBi_2Cl_{12}$  supercell cell. The trigonal  $R\bar{3}m$  space group was assumed.<sup>3</sup> The initial spin configuration

for  $\text{Cs}_4\text{MnBi}_2\text{Cl}_{12}$  was set as antiferromagnetic state where spins on Mn are parallel along lattice  $\vec{b}$  and antiparallel along lattice  $\vec{a}$ .<sup>4</sup> Upon Cd substitutional doping, the initial spin on dopant Cd is set to zero. The structures were optimized using the PBE functional<sup>5</sup> and the zero damping D3 correction of Grimme,<sup>6</sup> as inclusion of London dispersion in the functional for treating halide perovskites was emphasized,<sup>7</sup> and previously applied.<sup>8</sup> Geometries were fully relaxed regarding lattice parameters and interatomic distances until forces were less than 0.01 eV/Å. In both optimization and electronic structure calculations, spin polarization was included. In the electronic structure calculations for pristine  $\text{Cs}_4\text{MnBi}_2\text{Cl}_{12}$ , the PBE revised for solids (PBEsol) exchange-correction is adopted.<sup>9</sup>

Figure S4: Two tunneling spectra measured on the NPs marked by asterisk with corresponding colors shown in the topographic image presented in the inset. Both NPs are ~10 nm in lateral dimensions.

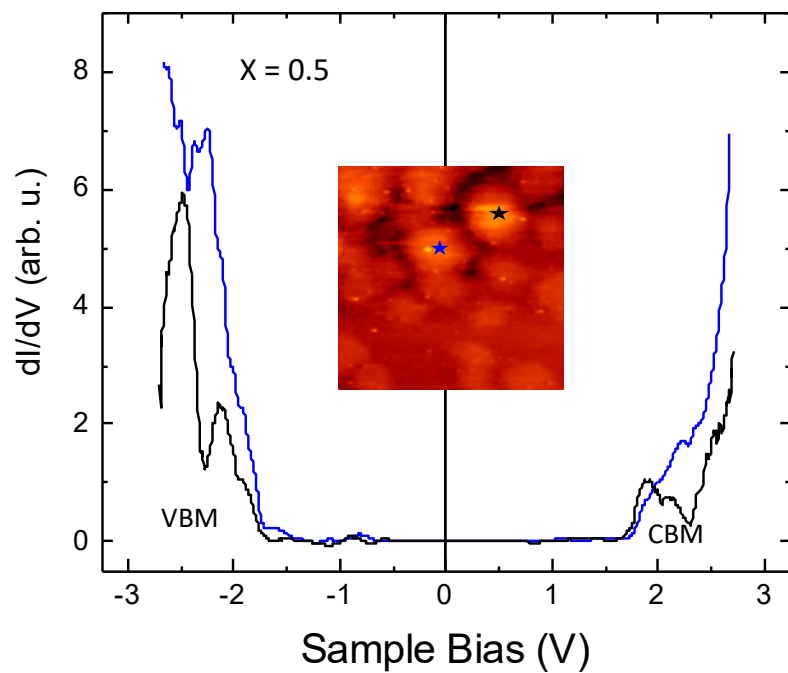

Figure S4: Two  $dI/dV$ - $V$  tunneling spectra measured on two different NPs marked by asterisks with corresponding colors shown in the  $40 \times 40 \text{ nm}^2$  STM topographic image presented in inset.

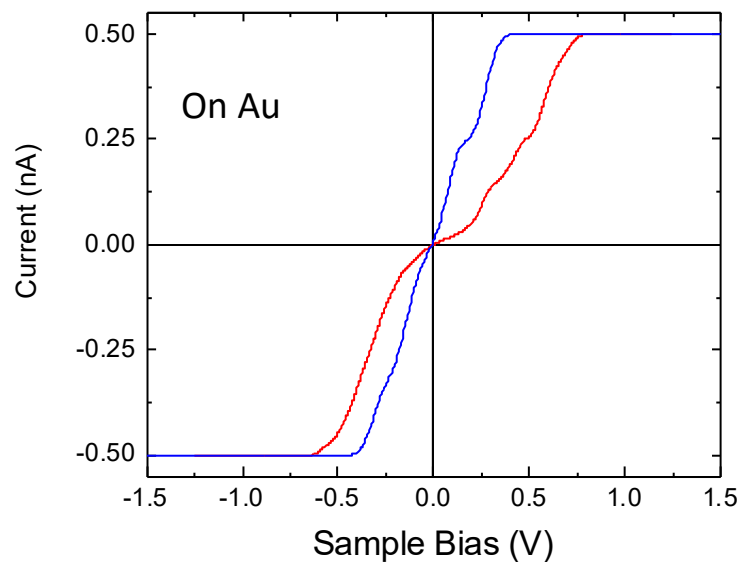

Figure S5: Two I-V characteristics measured on the Au substrate, aside of the NPs, after drop-casting the NPs in chloroform solution.

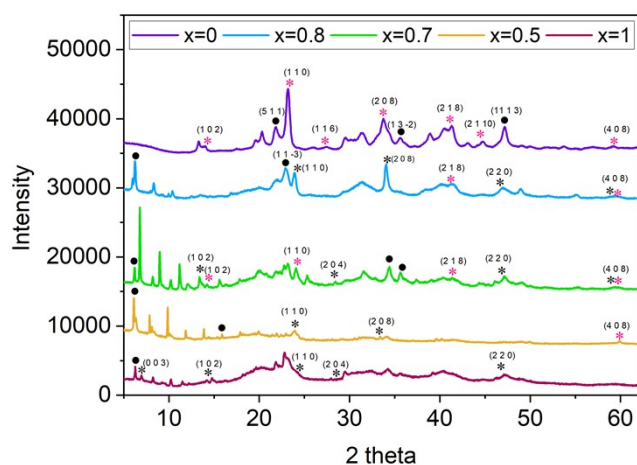

Figure S6: XRD pattern of the nanoparticles which indicate the presence of the desired phases  $\text{Cs}_4\text{Cd}_x\text{Mn}_{1-x}\text{Bi}_2\text{Cl}_{12}$  and  $\text{Cs}_3\text{BiCl}_6$ .

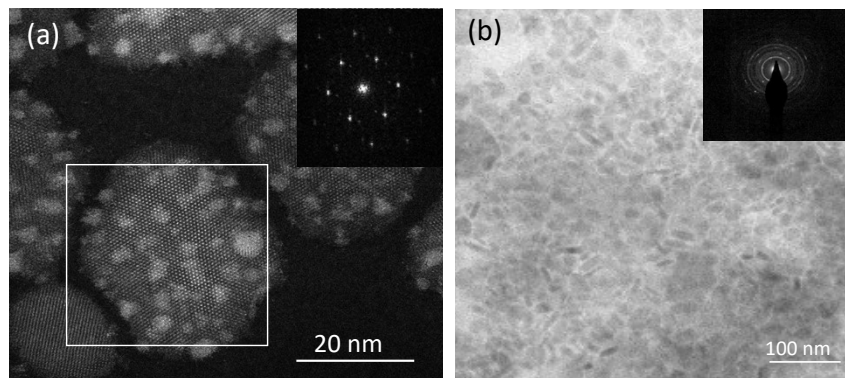

| (c) | h k l   | d-spacing [nm] |
|-----|---------|----------------|
|     | (0 1 1) | 0.640          |
|     | (1 1 0) | 0.377          |
|     | (0 2 5) | 0.309          |
|     | (1 2 4) | 0.241          |
|     | (0 3 0) | 0.218          |
|     | (2 2 0) | 0.190          |
|     | (0 4 1) | 0.164          |
|     | (0 4 4) | 0.161          |
|     | (1 3 4) | 0.143          |

**Figure S7:** HR-TEM image and the corresponding electron diffractions of  $\text{Cs}_4\text{CdBi}_2\text{Cl}_{12}$  NPs. (a) Zone axis  $[-1 -1 3]$  and (b) electron diffraction on larger area and the (c) corresponding h k l crystallographic planes.



## References

1. Hafner, J.; Kresse, G., *The Vienna Ab-initio Simulation Program VASP: An efficient and versatile tool for studying the structural, dynamic, and electronic properties of materials*. 1997; p 69-82.
2. Kresse, G.; Joubert, D., From ultrasoft pseudopotentials to the projector augmented-wave method. *Physical Review B* **1999**, *59* (3), 1758-1775.
3. Yang, H.; Shi, W.; Cai, T.; Hills-Kimball, K.; Liu, Z.; Dube, L.; Chen, O., Synthesis of lead-free Cs<sub>4</sub>(Cd<sub>1-x</sub>Mn<sub>x</sub>)Bi<sub>2</sub>Cl<sub>12</sub> (0 ≤ x ≤ 1) layered double perovskite nanocrystals with controlled Mn–Mn coupling interaction. *Nanoscale* **2020**, *12* (45), 23191-23199.
4. Vargas, B.; Torres-Cadena, R. I.; Reyes-Castillo, D. T.; Rodriguez-Hernandez, J.; Gembicky, M.; Menéndez-Proupin, E.; Solis-Ibarra, D., Chemical diversity in lead-free, layered double perovskites: a combined experimental and computational approach. *Chemistry of Materials* **2019**, *32* (1), 424-429.
5. Perdew, J. P.; Burke, K.; Ernzerhof, M., Generalized Gradient Approximation Made Simple. *Physical Review Letters* **1996**, *77* (18), 3865-3868.
6. Grimme, S.; Antony, J.; Ehrlich, S.; Krieg, H., A consistent and accurate ab initio parametrization of density functional dispersion correction (DFT-D) for the 94 elements H-Pu. *The Journal of Chemical Physics* **2010**, *132* (15), 154104.
7. Beck, H.; Gehrman, C.; Egger, D. A., Structure and binding in halide perovskites: Analysis of static and dynamic effects from dispersion-corrected density functional theory. *APL Materials* **2019**, *7* (2), 021108.
8. Zhang, L.; Liang, W., How the structures and properties of two-dimensional layered perovskites MAPbI<sub>3</sub> and CsPbI<sub>3</sub> vary with the number of layers. *The journal of physical chemistry letters* **2017**, *8* (7), 1517-1523.
9. Perdew, J. P.; Ruzsinszky, A.; Csonka, G. I.; Vydrov, O. A.; Scuseria, G. E.; Constantin, L. A.; Zhou, X.; Burke, K., Restoring the density-gradient expansion for exchange in solids and surfaces. *Physical Review Letters* **2008**, *100* (13), 136406.
10. Gajdoš, M.; Hummer, K.; Kresse, G.; Furthmüller, J.; Bechstedt, F., Linear optical properties in the projector-augmented wave methodology. *Physical Review B* **2006**, *73* (4), 045112.
